# Supplementary material for: Pyroptosis triggers pore-induced intracellular traps (PITs) that capture bacteria and lead to their clearance by efferocytosis
Source: PubMed Central journal article supplement — J Exp Med. 2016 Sep 19;213(10):2113–28. doi: 10.1084/jem.20151613 (PMC5030797; doi:10.1084/jem.20151613), 2016-09-19
Supplement: JEM_20151613_sm.pdf [file JEM_20151613_sm.pdf]

## SUPPLEMENTAL MATERIAL

Jorgensen et al., <http://www.jem.org/cgi/content/full/jem.20151613/DC1>

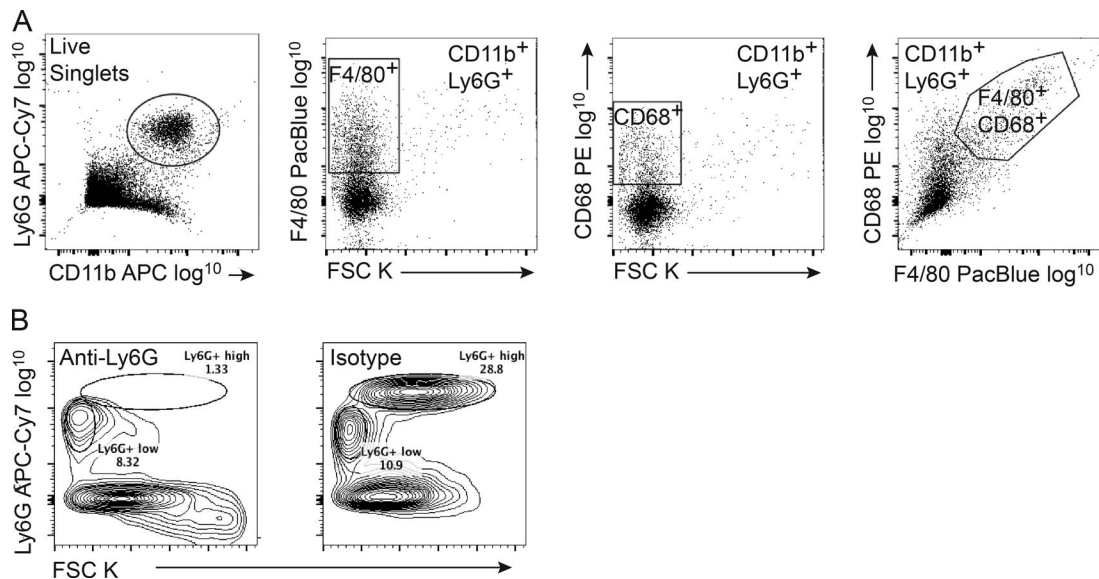

Figure S1. Splens from mice infected IP with control or *FltC<sup>ind</sup>* GFP-*S. Typhimurium* for 24 h and treated with doxycycline for 3.5 h were harvested and prepared for flow cytometry. (Related to Figs. 5, 6, and 7.) (A) Neutrophils with intracellular macrophage markers and GFP-*S. Typhimurium* (CD45<sup>+</sup> CD11b<sup>+</sup> Ly6G<sup>high</sup> CD68<sup>+</sup> F4/80<sup>+</sup> GFP<sup>+</sup>) were identified by flow cytometry. (B) WT mice (six animals per group) were injected with 500  $\mu$ g isotype or anti-Ly6G antibodies and infected at 24 h after antibody treatment. Depletion of CD11b<sup>+</sup> Ly6G<sup>high</sup> neutrophils was confirmed by flow cytometry.

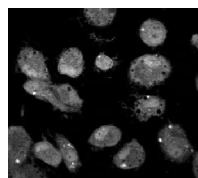

Video 1. Soluble GFP protein is released during pyroptosis (related to Fig. 1). 10<sup>6</sup> GFP-BMMs (white pseudocolor) were treated with 3  $\mu$ g/ml FlaTox in the presence of PI (red) and imaged by live cell confocal microscopy 2 h.

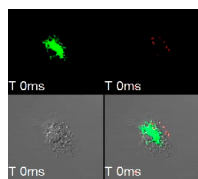

Video 2. Bacteria are trapped in the pyroptotic cell corpse (related to Fig. 2). 10<sup>6</sup> WT BMMs were labeled with ER tracker green and infected with SPI1-induced mCherry-*S. Typhimurium* MOI 25 for 30 min, washed, and treated with 15  $\mu$ g/ml gentamicin 30 min and imaged in the absence of antibiotics by live cell confocal microscopy for 2 h.

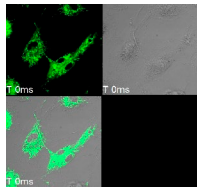

Video 3. **Macrophages phagocytose pyroptotic cell debris (related to Fig. 2).**  $10^6$  WT BMMs were labeled with MitoTracker Green and treated with 3  $\mu$ g/ml FlaTox. Cells were imaged by live cell confocal microscopy for 2 h.

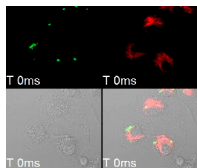

Video 4. **Macrophages phagocytose the entire pyroptotic cell corpse and trapped bacteria (related to Fig. 4).**  $10^6$  WT BMMs were labeled with Dextran Alexa555 and infected with SPI1-induced GFP-*S. Typhimurium* MOI 25 30 min, washed and treated with 15  $\mu$ g/ml gentamicin for 30 min, and imaged in the absence of antibiotics by live cell confocal microscopy for 2 h.

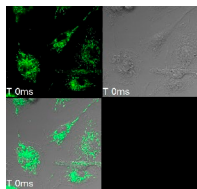

Video 5. **Multiple macrophages phagocytose a piece of the pyroptotic cell corpse each (related to Fig. 4).**  $10^6$  WT BMMs were labeled with MitoTracker Green and treated with 3  $\mu$ g/ml FlaTox. Cells were imaged by live cell confocal microscopy for 2 h.

Table S1. **Bacterial strains and growth conditions**

| Name of strain                                 | Designation                             | Culture condition in vitro                                       |                                    | Source                                                             |
|------------------------------------------------|-----------------------------------------|------------------------------------------------------------------|------------------------------------|--------------------------------------------------------------------|
|                                                |                                         | Inflammasome activation                                          | No inflammasome activation         |                                                                    |
| <i>S. Typhimurium</i> , WT                     | ATCC 14028s                             | Overnight culture 37°C, then 1:40 dilution 3 h 37°C, MOI 25, 2 h | Overnight culture 37°C MOI 25, 2 h | S. Miller, University of Washington, Seattle, WA                   |
| <i>S. typhimurium flgB</i> (used as WT)        | 14028s <i>flgB::Tn10</i>                | NA                                                               |                                    | K. Hughes, University of Utah, Salt Lake City, UT                  |
| <i>S. typhimurium</i> 1 ST-FluC <sup>ind</sup> | 14028s <i>flgB::Tn10</i> pEM087         | NA                                                               |                                    | Miao et al., 2010                                                  |
| <i>C. rodentium</i>                            | DBS100 ATCC 51459                       | NA                                                               | Overnight culture 37°C MOI 25, 2 h | B. Vallance, The University of British Columbia, Vancouver, Canada |
| <i>L. monocytogenes</i> , WT                   | 10403S                                  | NA                                                               | Overnight culture 30°C MOI 20, 2 h | M. Bevan, University of Washington, Seattle, WA                    |
| <i>L. monocytogenes</i> GFP                    | 10403s <i>DinIAB InlAmB</i> , pGFP, cmR | NA                                                               | Overnight culture 30°C MOI 20, 2 h | Pentecost et al., 2010                                             |
| <i>B. thailandensis</i> GFP                    | E264 pBBR2-eGFP                         | NA                                                               | Overnight culture 37°C MOI 25, 2 h | S. Miller, University of Washington, Seattle, WA                   |
| <i>F. novicida</i> , WT                        | U112                                    | NA                                                               | Overnight culture 30°C MOI 25, 2 h | S. Miller, University of Washington, Seattle, WA                   |

Table S2. **Plasmids and growth conditions**

| Plasmid | Resistance   | Notes                                                        | Reference                 |
|---------|--------------|--------------------------------------------------------------|---------------------------|
| pEM087  | Amp, Tet     | pWSK29 expressing <i>fliC fliS</i> from <i>tetA</i> promoter | Miao et al., 2010         |
| pWSK129 | Kan, Tet     | Low copy vector                                              | Wang and Kushner, 1991    |
| pWSK29  | Amp, Tet     | Low copy vector                                              | Wang and Kushner, 1991    |
| mCherry | mCherry::amp | Constitutive mCherry expression                              | Drecktrah et al., 2008    |
| GFP     | GFP::kan     | Constitutive GFP expression                                  | Valdivia and Falkow, 1997 |

## REFERENCES

- Drecktrah, D., S. Levine-Wilkinson, T. Dam, S. Winfree, L.A. Knodler, T.A. Schroer, and O. Steele-Mortimer. 2008. Dynamic behavior of *Salmonella*-induced membrane tubules in epithelial cells. *Traffic*. 9:2117–2129. <http://dx.doi.org/10.1111/j.1600-0854.2008.00830.x>
- Miao, E.A., I.A. Leaf, P.M. Treuting, D.P. Mao, M. Dors, A. Sarkar, S.E. Warren, M.D. Wewers, and A. Aderem. 2010. Caspase-1-induced pyroptosis is an innate immune effector mechanism against intracellular bacteria. *Nat. Immunol.* 11:1136–1142. <http://dx.doi.org/10.1038/ni.1960>
- Pentecost, M., J. Kumaran, P. Ghosh, and M.R. Amieva. 2010. *Listeria monocytogenes* internalin B activates junctional endocytosis to accelerate intestinal invasion. *PLoS Pathog.* 6:e1000900. <http://dx.doi.org/10.1371/journal.ppat.1000900>
- Valdivia, R.H., and S. Falkow. 1997. Fluorescence-based isolation of bacterial genes expressed within host cells. *Science*. 277:2007–2011. <http://dx.doi.org/10.1126/science.277.5334.2007>
- Wang, R.F., and S.R. Kushner. 1991. Construction of versatile low-copy-number vectors for cloning, sequencing and gene expression in *Escherichia coli*. *Gene*. 100:195–199. [http://dx.doi.org/10.1016/0378-1119\(91\)90366-J](http://dx.doi.org/10.1016/0378-1119(91)90366-J)
